# Supplementary material
Source: PubMed Central journal article supplement (PMC6162166)
Supplement: NIHMS964277-supplement-supplement_1.pdf [file NIHMS964277-supplement-supplement_1.pdf]

**Supplemental Figure 1:** BVES messenger RNA in the colon by high resolution *in situ* hybridization (RNAscope).

**Supplemental Figure 2:** Colonic crypts were isolated for immunoblot and immunofluorescence done on swiss-rolls. (A) Zo-1 expression is quantified (*Bves*<sup>-/-</sup> vs. WT,  $1.3 \pm 0.1$  vs.  $1.0 \pm 0.1$   $P=0.13$ , n=2) and E-cadherin expression ( $P=ns$ , n=4). Immunofluorescence shown for ZO-1 and E-cadherin. (B) Immunofluorescence shown for  $\beta$ -catenin.

**Supplemental Figure 3:** Immunofluorescence for (A) myosin 2B, (B) phalloidin, and (C) myosin 2C. Myosin 2C expression quantified by immunoblot (*Bves*<sup>-/-</sup> vs. WT,  $1.5 \pm 0.1$  vs.  $1.0 \pm 0.1$  fold increase,  $*P<0.05$ , n=2).

**Supplemental Figure 4:** Apoptosis quantified via TUNEL staining after *C.rodentium* (*Bves*<sup>-/-</sup> vs. WT,  $2.9 \pm 0.2$  vs.  $2.5 \pm 0.7$ ,  $P=0.92$ ).

**Supplemental Figure 5:** Body weights shown for (A) Acute DSS (Day 5; *Bves*<sup>-/-</sup> vs. WT,  $0.99 \pm 0.02x$  vs.  $1.03 \pm 0.01x$  original body weight,  $P=0.14$ , n=6-7) and (B) Injury-Repair

trials. (C) *Cxcl1* mRNA expression was quantified ( $P=ns$ ,  $n=4$ ). (D) Neutrophil count by Ly6B.2 positive cells quantified by immunofluorescence (Day 5 after acute DSS; *Bves*<sup>-/-</sup> vs. WT,  $P=ns$ ,  $n=4$ ).

**Supplemental Figure 6:** (A) Overexpression of *BVES* quantified at mRNA level (empty vector (EV) vs. *BVES*,  $1.0 \pm 0.07$  vs.  $324.5 \pm 32.2$ , \*\*\* $P<0.001$ ). (B) *Il-8* mRNA expression quantified after 3 hour EPEC infection (EV vs. *BVES*,  $13.3 \pm 1.7$  fold vs.  $5.7 \pm 1.2$  fold, \* $P<0.05$ , 2 experiments with 3 replicates each time). (C) Number of actin stalks quantified after 3 hours EPEC infection (EV vs. *BVES*,  $11.1 \pm 0.8$  vs.  $3.8 \pm 0.9$ , \*\*\* $P<0.001$ , 2 experiments with 3 replicates each time). Red cells express *BVES*, and green dots represent individual actin stalks. Images are taken using confocal microscopy, 63x.

Supplemental Figure 1

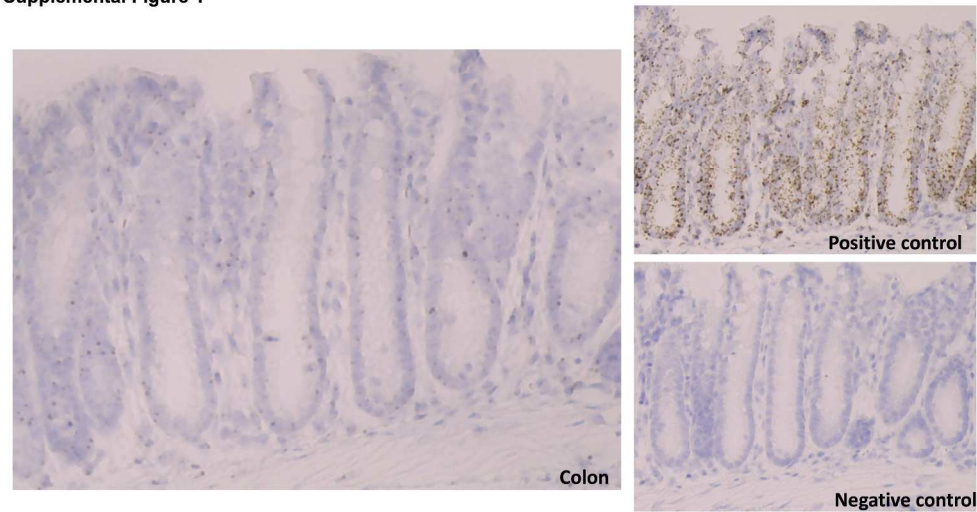

338x190mm (300 x 300 DPI)

Supplemental Figure 2

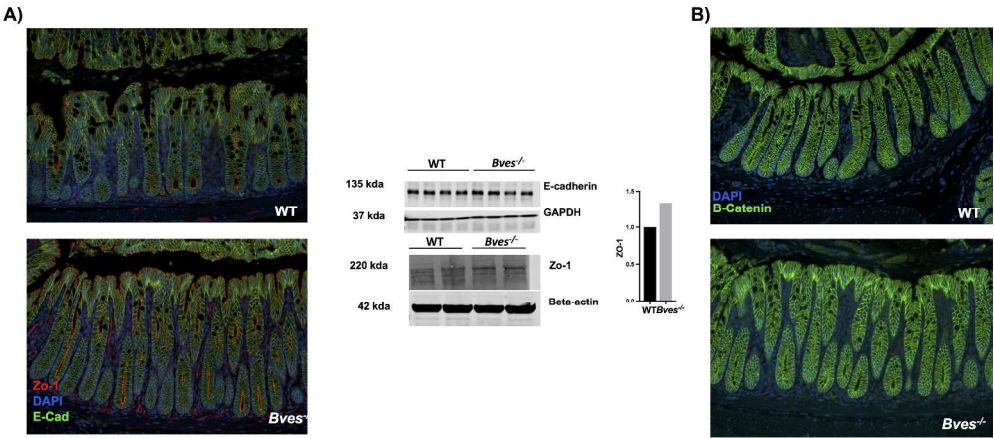

338x190mm (300 x 300 DPI)

Supplemental Figure 3

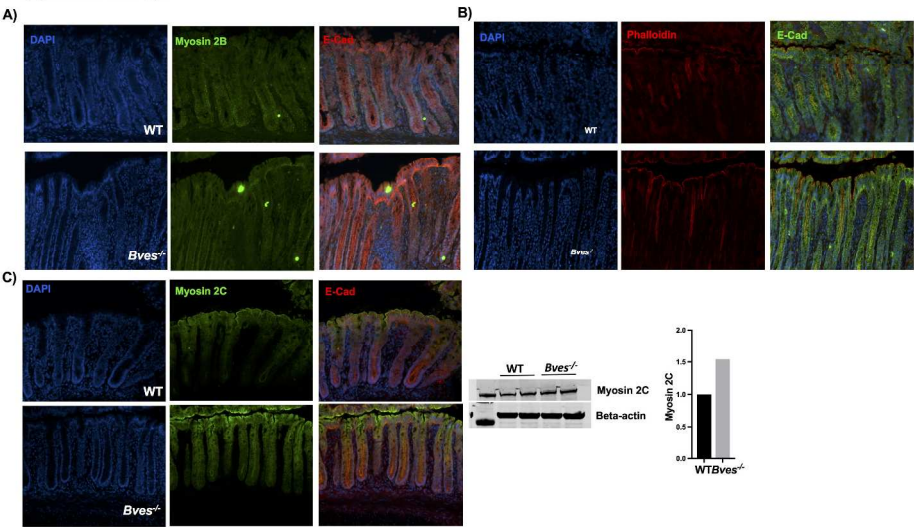

338x190mm (300 x 300 DPI)

Supplemental Figure 4

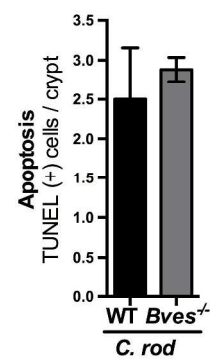

338x190mm (300 x 300 DPI)

Supplemental Figure 5

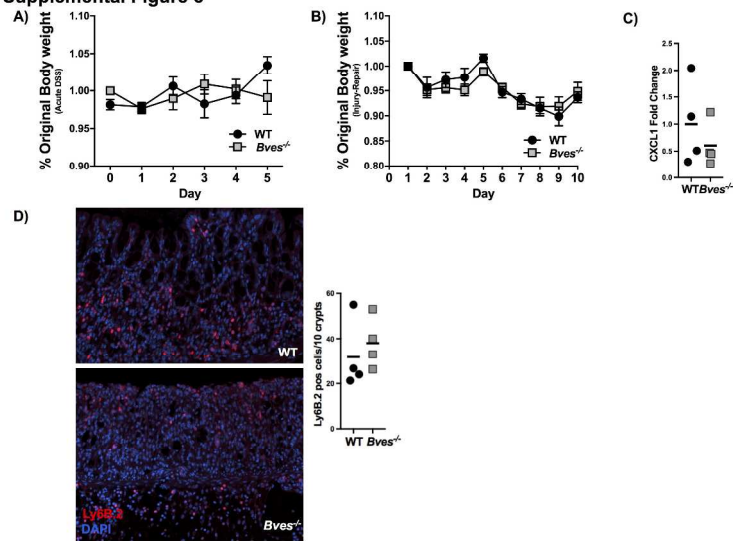

338x190mm (300 x 300 DPI)

Supplemental Figure 6

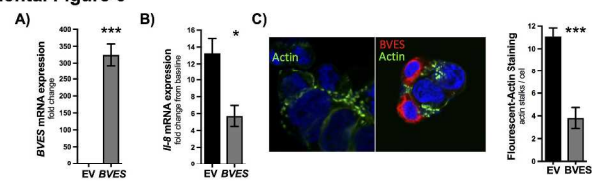

338x190mm (300 x 300 DPI)

**S1 Table. Cytokine and chemokine concentrations in colonic tissues after adjusting for baseline levels.**

| Analyte | WT <i>C. rod</i> | <i>Bves</i> <sup>-/-</sup> <i>C. rod</i> |
|---------|------------------|------------------------------------------|
| CCL2    | 1.6 ± 0.8        | 2.4 ± 0.5                                |
| CCL3    | 3.3 ± 0.9        | 4.9 ± 1.6                                |
| CCL4    | 6.3 ± 1.9        | 3.6 ± 0.7                                |
| CCL5    | 1.6 ± 0.2        | 1.2 ± 0.1                                |
| CXCL1   | 2.5 ± 0.8        | 6.2 ± 0.8*                               |
| CXCL2   | 38.2 ± 17.4      | 43.9 ± 12.4                              |
| CXCL10  | 4.0 ± 1.0        | 5.8 ± 1.0                                |
| G-CSF   | 1.4 ± 0.7        | 10.5 ± 1.6***                            |
| GM-CSF  | 1.6 ± 0.4        | 1.0 ± 0.2                                |
| IL-1α   | 0.7 ± 0.2        | 0.2 ± 0.0                                |
| IL-1β   | 2.4 ± 0.9        | 6.4 ± 1.4                                |
| IL-2    | 0.8 ± 0.1        | 0.8 ± 0.1                                |
| IL-4    | 0.6 ± 0.1        | 0.7 ± 0.1                                |
| IL-5    | 0.4 ± 0.1        | 0.5 ± 0.1                                |
| IL-6    | 7.4 ± 4.0        | 32.9 ± 6.3**                             |
| IL-7    | 1.0 ± 0.1        | 2.4 ± 0.4***                             |
| IL-9    | 1.5 ± 0.3        | 1.5 ± 0.2                                |
| IL-10   | 0.4 ± 0.1        | 0.5 ± 0.0                                |
| IL-15   | 0.4 ± 0.1        | 1.1 ± 0.3                                |
| IL-17   | 1.6 ± 0.4        | 5.5 ± 0.8**                              |
| TNF-α   | 3.9 ± 1.2        | 4.8 ± 0.9                                |
| IFN-γ   | 6.4 ± 2.6        | 6.2 ± 1.1                                |

Values represent the mean ± SEM of the cytokine/chemokine concentrations relative to baseline in the colonic tissues, measured by Luminex assay. *WT C. rod* is adjusted according to baseline measurement in *WT Ctrl* mice, and *Bves*<sup>-/-</sup> *C. rod* is adjusted according to baseline measurement in *Bves*<sup>-/-</sup> *Ctrl* mice. \**P*<0.05, \*\**P*<0.01, \*\*\**P*<0.001; *n*=3-9 uninfected and *n*=6-7 infected mice for each genotype.

**S2 Table. Cytokine and chemokine concentrations in colonic tissues**

| Analyte | WT Ctrl    | <i>Bves</i> <sup>-/-</sup> Ctrl | WT <i>C. rod</i> | <i>Bves</i> <sup>-/-</sup> <i>C. rod</i> |
|---------|------------|---------------------------------|------------------|------------------------------------------|
| CCL2    | 4.7 ± 0.7  | 10.2 ± 3.2                      | 7.3 ± 3.6        | 24.6 ± 5.0†                              |
| CCL3    | 3.4 ± 0.6  | 4.5 ± 0.4                       | 11.3 ± 3.1**     | 13.5 ± 2.8                               |
| CCL4    | 1.0 ± 0.1  | 3.4 ± 1.1                       | 6.4 ± 1.9        | 12.0 ± 2.3                               |
| CCL5    | 13.3 ± 2.5 | 27.5 ± 3.2**                    | 20.8 ± 2.9*      | 31.2 ± 2.5†                              |
| CXCL1   | 10.0 ± 2.0 | 8.9 ± 0.9                       | 25.2 ± 8.3       | 55.2 ± 7.3†                              |
| CXCL2   | 4.2 ± 1.4  | 4.7 ± 0.9                       | 161.6 ± 73.5*    | 207.7 ± 58.6                             |
| CXCL10  | 30.2 ± 5.9 | 23.6 ± 2.1                      | 121.6 ± 30.9**   | 135.7 ± 24.4                             |
| G-CSF   | 21.1 ± 9.4 | 1.6 ± 0.2*                      | 30.0 ± 14.0      | 19.2 ± 2.9                               |
| GM-CSF  | 2.3 ± 0.4  | 5.6 ± 1.2                       | 3.7 ± 1.0        | 5.7 ± 1.3                                |
| IL-1α   | 7.9 ± 2.2  | 54.4 ± 15.6**                   | 5.5 ± 1.4        | 8.8 ± 1.8                                |
| IL-1β   | 14.2 ± 5.1 | 4.2 ± 0.5*                      | 34.1 ± 13.4      | 27.0 ± 6.0                               |
| IL-2    | 0.5 ± 0.1  | 0.6 ± 0.1                       | 0.4 ± 0.1        | 0.5 ± 0.1                                |
| IL-4    | 0.2 ± 0.0  | 0.2 ± 0.0                       | 0.1 ± 0.0**      | 0.1 ± 0.0                                |
| IL-5    | 0.2 ± 0.0  | 0.9 ± 0.1**                     | 0.1 ± 0.0        | 0.5 ± 0.1†                               |
| IL-6    | 1.5 ± 0.7  | 0.5 ± 0.1*                      | 11.0 ± 6.0       | 15.5 ± 3.0                               |
| IL-7    | 2.2 ± 0.3  | 1.0 ± 0.2                       | 2.1 ± 0.1        | 2.4 ± 0.4                                |
| IL-9    | 9.5 ± 2.6  | 7.9 ± 1.1                       | 14.3 ± 2.6       | 11.7 ± 1.8                               |
| IL-10   | 1.7 ± 0.2  | 2.6 ± 0.5                       | 0.7 ± 0.1**      | 1.4 ± 0.1††                              |
| IL-15   | 3.6 ± 1.5  | 9.7 ± 1.2*                      | 1.5 ± 0.4        | 11.1 ± 2.6††                             |
| IL-17   | 2.2 ± 0.5  | 0.9 ± 0.1*                      | 3.4 ± 0.8        | 4.9 ± 0.7                                |
| TNF-α   | 1.9 ± 0.4  | 1.5 ± 0.1                       | 7.4 ± 2.4*       | 7.2 ± 1.3                                |
| IFN-γ   | 2.3 ± 0.4  | 2.2 ± 0.3                       | 15.1 ± 6.0**     | 13.8 ± 2.4                               |

Values represent the mean ± SEM of the cytokine/chemokine concentrations (pg/mg total protein) in the colonic tissues, measured by Luminex assay. Ctrl, uninfected mice; *C. rod*, *C. rodentium*-infected mice. \* $P < 0.05$ , \*\* $P < 0.01$  vs. WT ctrl; † $P < 0.05$ , †† $P < 0.01$ , vs. WT mice infected with *C. rodentium*;  $n = 3-9$  uninfected and  $n = 6-7$  infected mice for each genotype.
